# Supplementary material for: Growth Inhibition of Sulfate-Reducing Bacteria in Produced Water from the Petroleum Industry Using Essential Oils
Source: MDPI journal article supplement (doi:10.3390/molecules22040648), 2017-04-19

Figure S1. Dendrogram based on DGGE profiles (16S rRNA coding gene fragments) of the four produced water samples received from Petrobras Ilha Grande Bay Oil Terminal (TEBIG) using the Pearson similarity coefficient and the UPGMA clustering method.

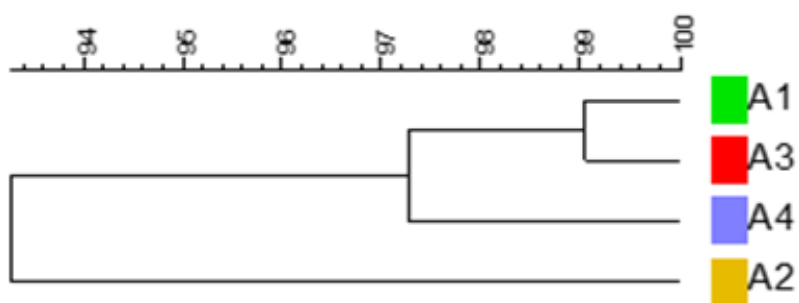

Supplement: s1 [file s1]
